# Supplementary material for: Quercetin Reduces the Development of 2,3,7,8-Tetrachlorodibenzo-p-dioxin-Induced Cleft Palate in Mice by Suppressing CYP1A1 via the Aryl Hydrocarbon Receptor
Source: MDPI journal article supplement (doi:10.3390/nu14122448), 2022-06-13
Supplement: s1 [file s1]

| Group       | 1st RLU |        | average RLU | TCDD activity | sample activity | suppression rate (%) |
|-------------|---------|--------|-------------|---------------|-----------------|----------------------|
| CTRL        | 32955   | 31806  | 32381       | 760002        |                 |                      |
| TCDD        | 826539  | 758225 | 792382      |               |                 |                      |
| Q250        | 51277   | 50317  | 50797       |               | 18417           |                      |
| Q50         | 39019   | 38852  | 38936       |               | 6555            |                      |
| Q25         | 32380   | 29439  | 30910       |               | -1471           |                      |
| TCDD + Q250 | 54148   | 51364  | 52756       |               | 20376           | 97.3%                |
| TCDD + Q50  | 36667   | 37249  | 36958       |               | 4578            | 99.4%                |
| TCDD + Q25  | 38462   | 35561  | 37012       |               | 4631            | 99.4%                |

  

| Group       | 2nd RLU |        | average RLU | TCDD activity | sample activity | suppression rate (%) |
|-------------|---------|--------|-------------|---------------|-----------------|----------------------|
| CTRL        | 24551   | 26105  | 25328       | 743507        |                 |                      |
| TCDD        | 764166  | 773503 | 768835      |               |                 |                      |
| Q250        | 35194   | 36560  | 35877       |               | 10549           |                      |
| Q50         | 29947   | 29635  | 29791       |               | 4463            |                      |
| Q25         | 25015   | 25968  | 25492       |               | 164             |                      |
| TCDD + Q250 | 36206   | 38724  | 37465       |               | 12137           | 98.4%                |
| TCDD + Q50  | 30583   | 28514  | 29549       |               | 4221            | 99.4%                |
| TCDD + Q25  | 25841   | 28980  | 27411       |               | 2083            | 99.7%                |

| Group       | 3rd RLU |         | average RLU | TCDD activity | sample activity | suppression rate (%) |
|-------------|---------|---------|-------------|---------------|-----------------|----------------------|
| CTRL        | 43650   | 53367   | 48509       |               |                 |                      |
| TCDD        | 1153688 | 1220048 | 1186868     | 1138360       |                 |                      |
| Q250        | 62880   | 56349   | 59615       |               | 11106           |                      |
| Q50         | 37218   | 42409   | 39814       |               | -8695           |                      |
| Q25         | 38430   | 35221   | 36826       |               | -11683          |                      |
| TCDD + Q250 | 59226   | 65455   | 62341       |               | 13832           | 98.8%                |
| TCDD + Q50  | 35112   | 41453   | 38283       |               | -10226          | 100.9%               |
| TCDD + Q25  | 33043   | 42826   | 37935       |               | -10574          | 100.9%               |

A formula: TCDD activity = TCDD's RLU - CTRL's RLU

sample activity = sample's RLU - CTRL's RLU

suppression rate (%) = TCDD activity - sample activity / TCDD activity  $\times$  100

Figure S1
